# Supplementary material
Source: PubMed Central journal article supplement (PMC3048666)
Supplement: supp_M110.173468_jbc.M110.173468-1.pdf [file supp_M110.173468_jbc.M110.173468-1.pdf]

# Supplemental Figure 1

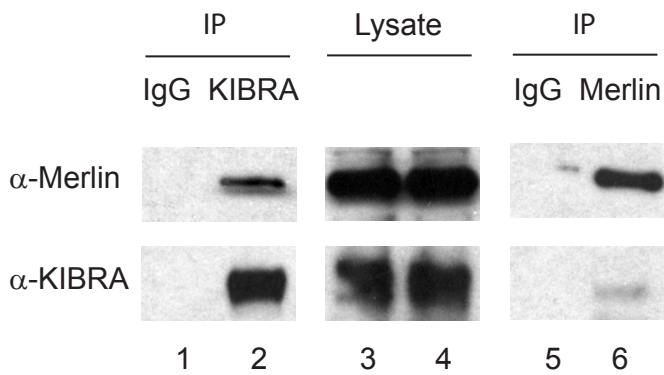

Supplemental Figure 1. KIBRA associates with NF2/Merlin in human cells. KIBRA proteins were immunoprecipitated from HEK293T cells by an antibody against human KIBRA (normal rabbit IgG was included as controls). The immunoprecipitates were probed with anti-Merlin. Similar immunoprecipitations were done with an anti-Merlin antibody and KIBRA was probed in the immunoprecipitates. A fraction of total cell lysates was also probed with the indicated antibodies to determine expression levels.

## Supplemental Figure 2

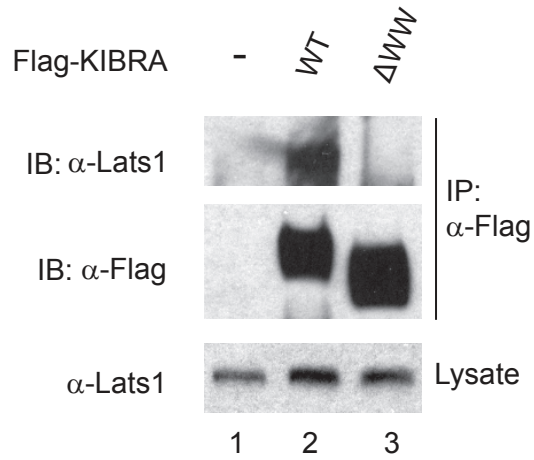

Supplemental Figure 2. The WW domains are required for KIBRA binding to Lats1. Flag-tagged KIBRA constructs were transfected into HEK293T cells as indicated. At 48h after transfection, cells were lysed and immunoprecipitated with anti-Flag antibody. Immunoprecipitated products were subjected to western blot with Lats1 antibody to check for the presence of endogenous Lats1.

## Supplemental Figure 3

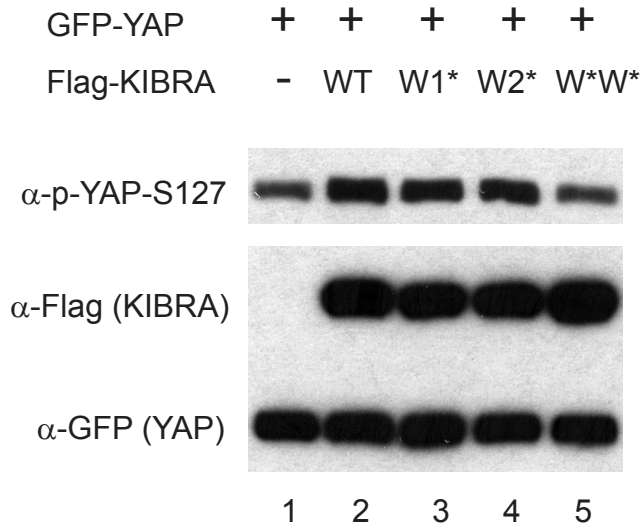

Supplemental Figure 3. KIBRA regulates YAP phosphorylation. GFP-YAP was co-transfected with Flag-KIBRA or its derivatives in HEK293T cells. Total cell lysates were probed with indicated antibodies. Note the increased phospho-S127 YAP signal in the presence of Flag-KIBRA (lane 2), but not Flag-KIBRA with both WW domains mutated (W\*W\*, lane 5). W1\* indicates the first WW domain mutant (W34A/P37A), W2\* indicates the second WW domain mutant (P84A), W\*W\* indicates Flag-KIBRA with mutations at both WW domains (W34A/P37A and P84A)
